# Supplementary material for: NIR-II window absorbing graphene oxide-coated gold nanorods and graphene quantum dot-coupled gold nanorods for photothermal cancer therapy
Source: publisher site journal article supplement (doi:10.1515/ntrev-2022-0541), 2023-01-01
Supplement: Supplementary file 1 [file ntrev-2022-0541_sm.pdf]

## Supplementary material

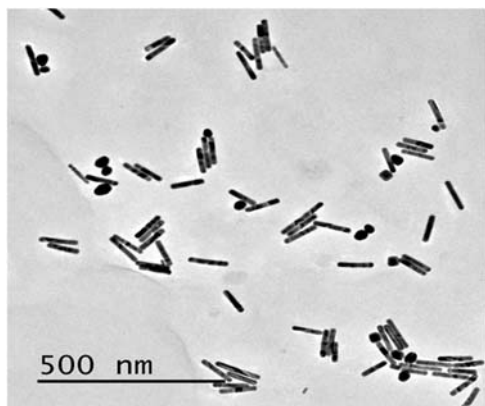

**Figure S1:** Large scale AuNRs TEM image. (Scale 500 nm).

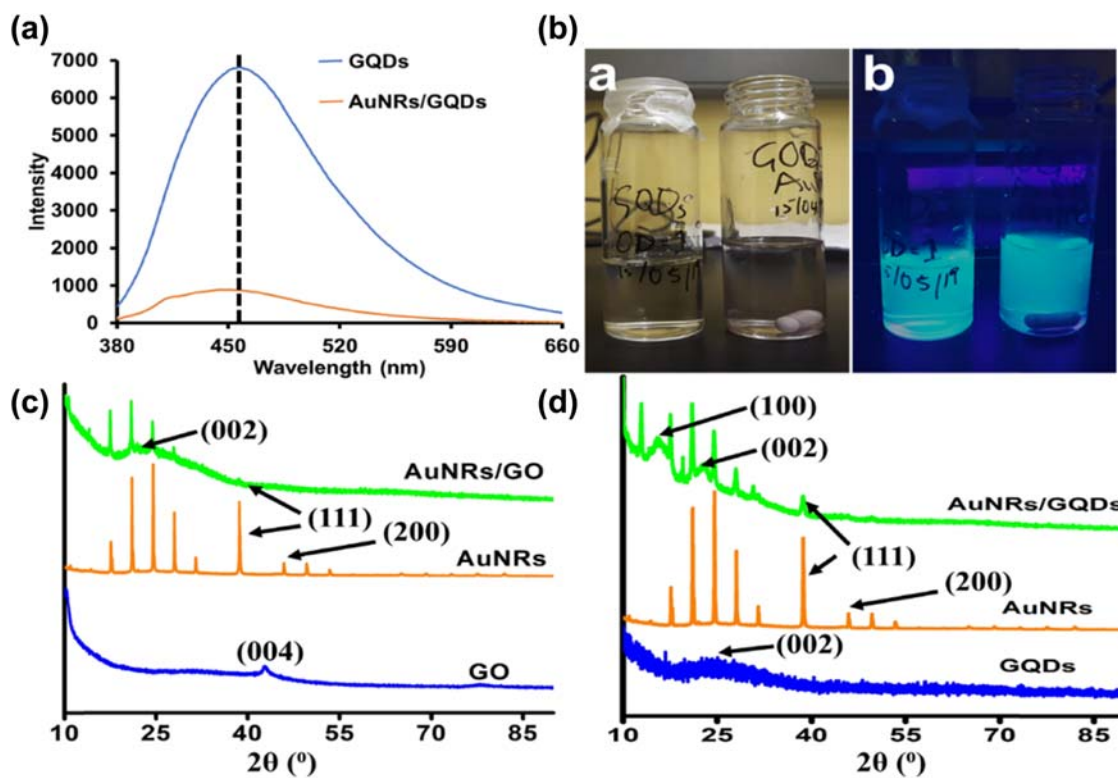

**Figure S2:** GQDs and AuNRs/GQDs (a) PL spectrum and (b) photographic image in the (a) normal lighting and (b) under UV lights. XRD patterns of (c) AuNRs/GO and (d) AuNRs/GQDs.

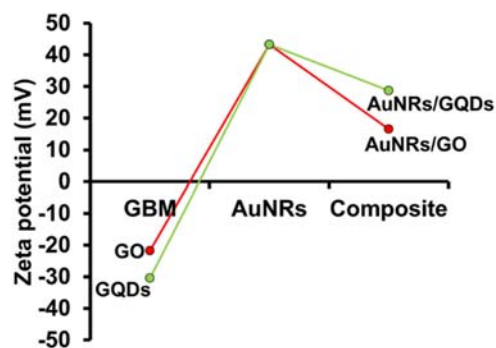

Figure S3: Zeta potential of GO, GQDs, AuNRs, and composites.

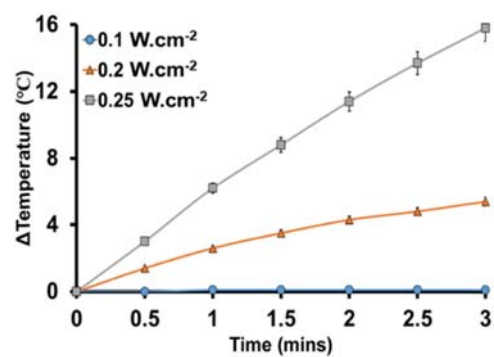

Figure S5: The temperature change of deionized water when irradiated with different laser power densities.

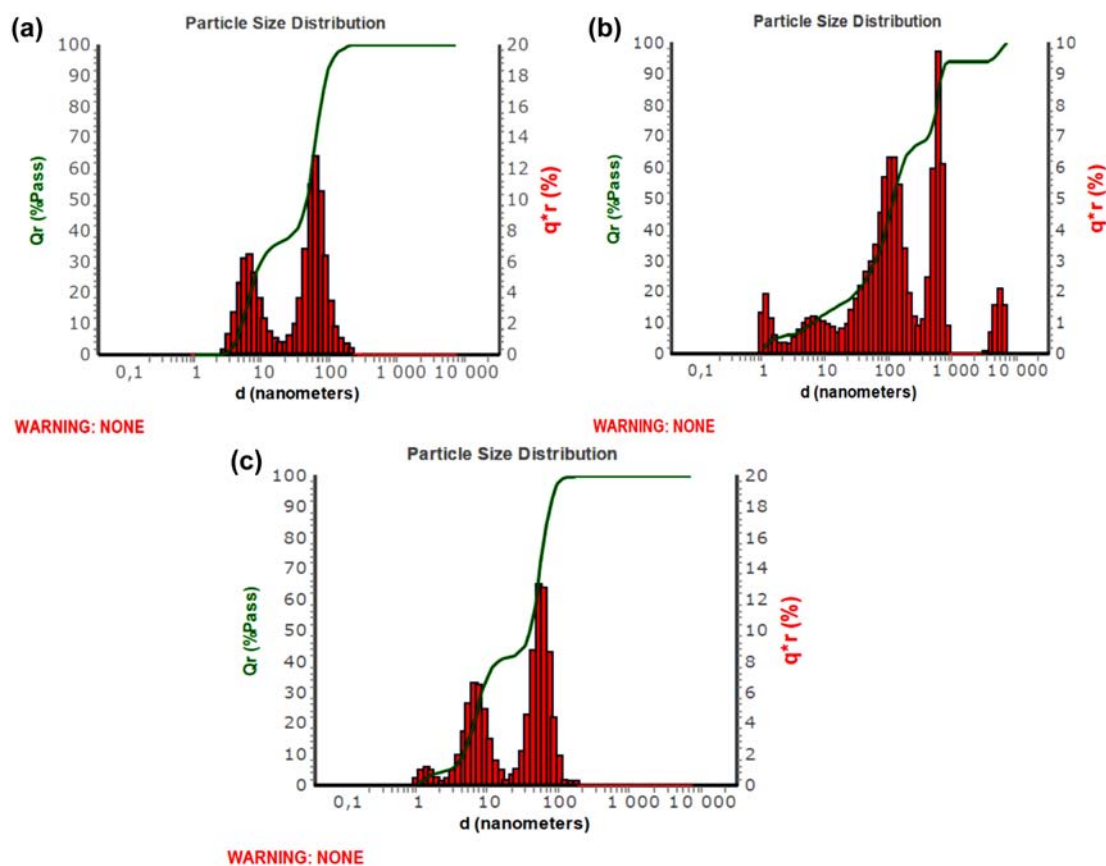

Figure S4: The Hydrodynamic size distribution of (a) AuNRs, (b) AuNRs/GO and (c) AuNRs/GQDs.

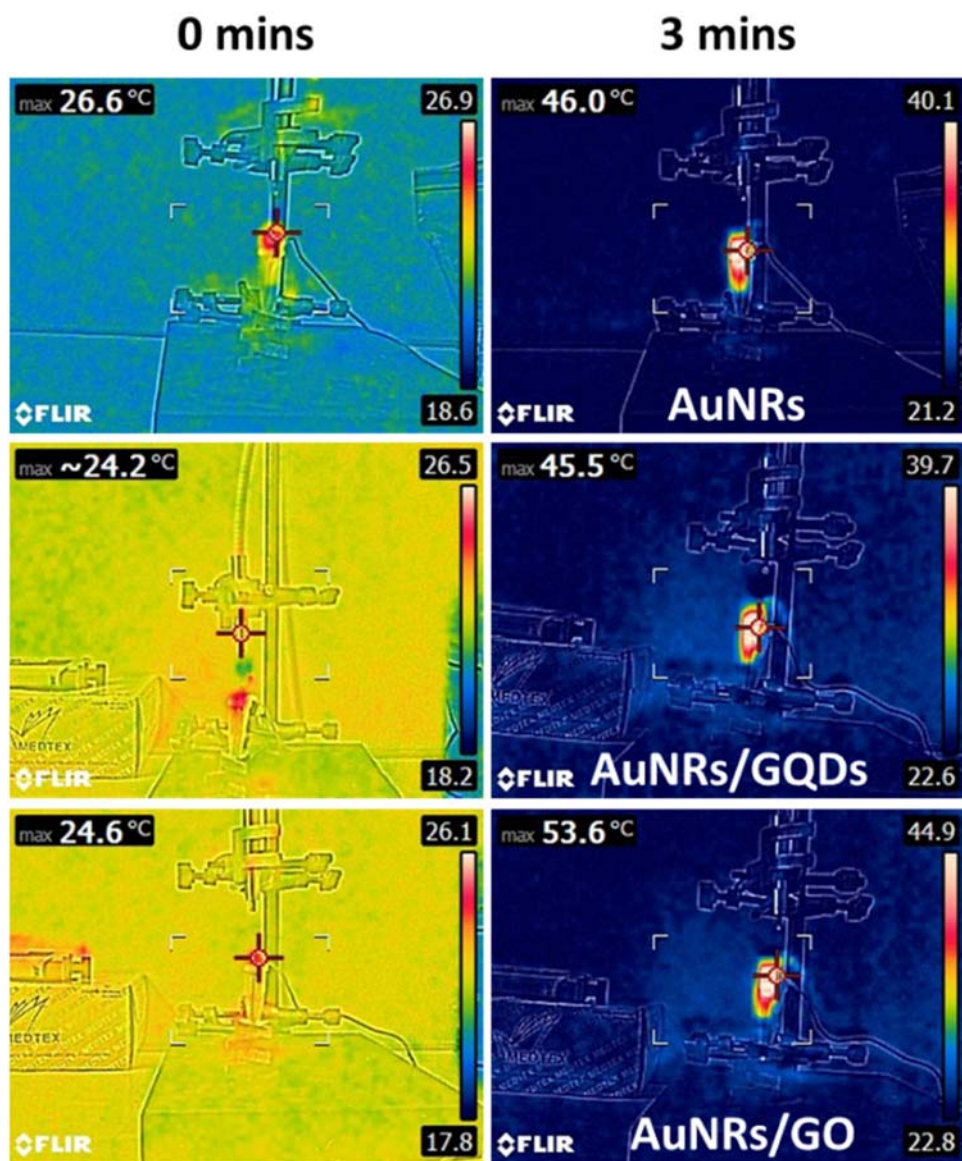

**Figure S6:** The temperature change from 0 mins and 3 mins of AuNRs, AuNRs/GO and AuNRs/GQDs ( $50 \mu\text{g} \cdot \text{mL}^{-1}$ ) when irradiated with with NIR laser ( $1064 \text{ nm}$ ) at  $0.2 \text{ W} \cdot \text{cm}^{-2}$ .

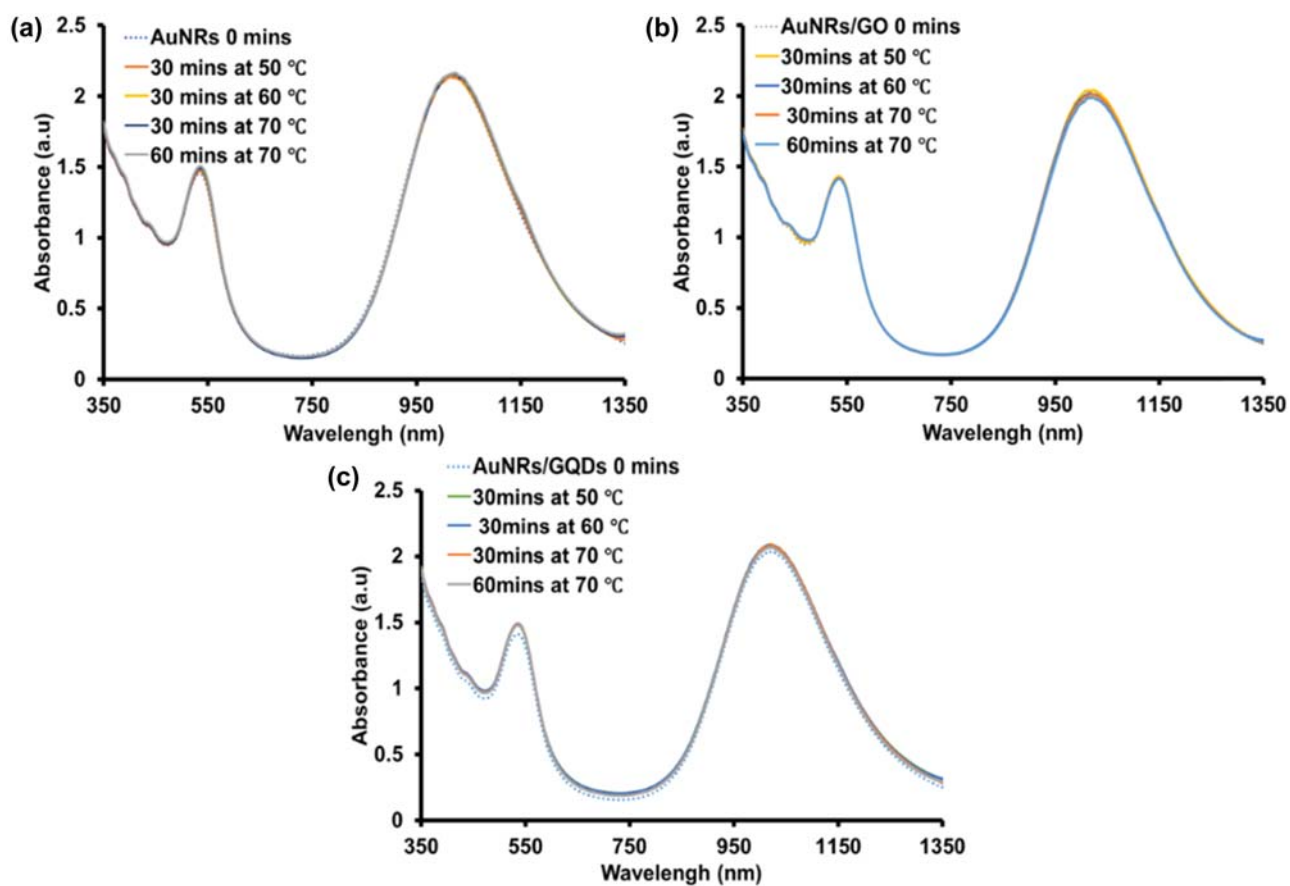

**Figure S7:** Thermal stability of A) AuNRs B) AuNRs/GO and C) AuNRs/GQDs incubated at 50°C, 60°C, 70°C for 30°C mins and 60°C mins at 70°C.

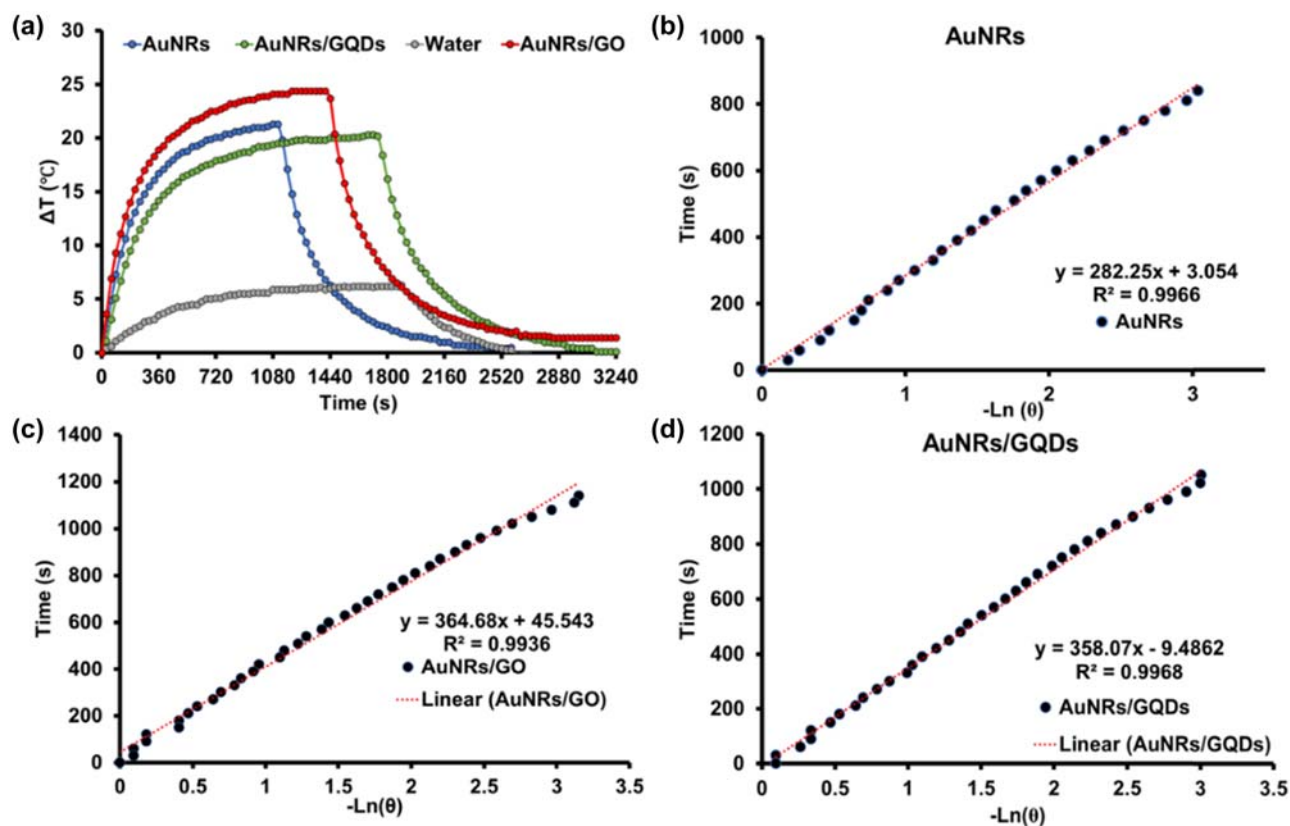

**Figure S8:** (a) Temperature changes with time upon laser irradiation and the cooling process when the laser is off (1064 nm laser,  $0.2 \text{ W} \cdot \text{cm}^{-2}$ ) for denoised water, AuNRs, AuNRs/GO and AuNRs/GQDs. (b) AuNRs linear-time data versus  $-\ln(\theta)$  obtained from the cooling period. (c) AuNRs/GO linear-time data versus  $-\ln(\theta)$  obtained from the cooling period. (d) AuNRs/GQDs linear-time data versus  $-\ln(\theta)$  obtained from the cooling period.
